# Supplementary material
Source: PubMed Central journal article supplement (PMC6644450)
Supplement: ao8b00923_si_001.pdf [file ao8b00923_si_001.pdf]

## Supporting Information

### **Bimetallic zeolitic imidazolate framework as an intrinsic two-photon fluorescence and pH-responsive MR imaging agent**

Gaozheng Zhao<sup>1</sup>, Huihui Wu<sup>2</sup>, Ruilu Feng<sup>1</sup>, Dongdong Wang<sup>1</sup>, Pengping Xu<sup>1</sup>, Haibao Wang<sup>3\*</sup>, Zhen Guo<sup>2\*</sup>, and Qianwang Chen<sup>1\*</sup>

<sup>1</sup>Hefei National Laboratory for Physical Sciences at Microscale, Department of Materials Science & Engineering & Collaborative Innovation Center of Suzhou Nano Science and Technology, CAS High Magnetic Field Laboratory, University of Science and Technology of China, Hefei, 230026, China, E-mail: cqw@ustc.edu.cn;

<sup>2</sup>Anhui Key Laboratory for Cellular Dynamics and Chemical Biology, School of Life Sciences, University of Science and Technology of China, Hefei, 230027, China, E-mail: zhenguo@ustc.edu.cn;

<sup>3</sup>Radiology Department of the First Affiliated Hospital of Anhui Medical University, Hefei, 230022, China, E-mail: whblqh@mail.ustc.edu.cn;

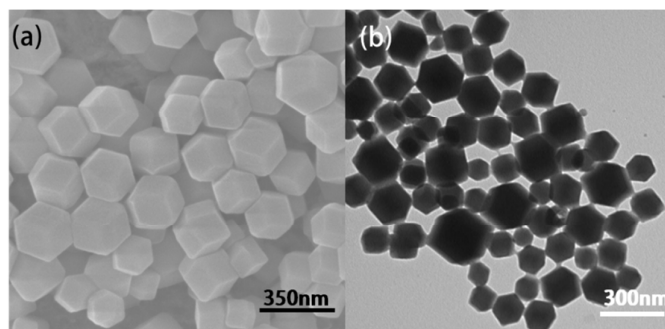

Figure S1. (a) SEM and (b) TEM images of the precursor ZIF-8.

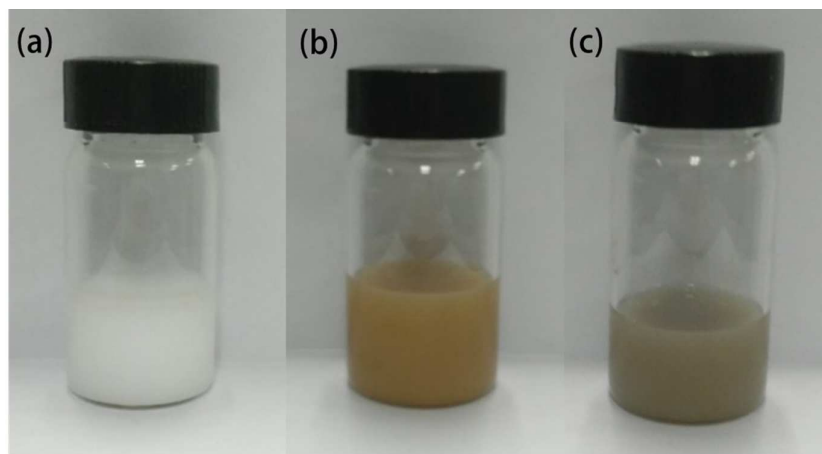

Figure S2. Photograph of (a) ZIF-8 (b) Mn-Zn-ZIF and (c) Mn-Zn-ZIF-PEG dispersed in methanol solution.

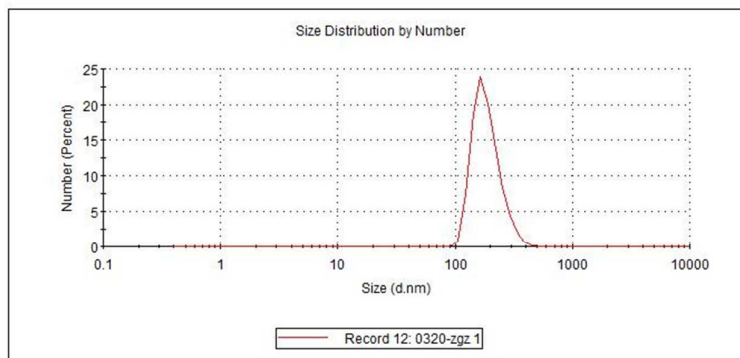

Figure S3. Hydrodynamic size distribution of the Mn-Zn-ZIF nanoparticles.

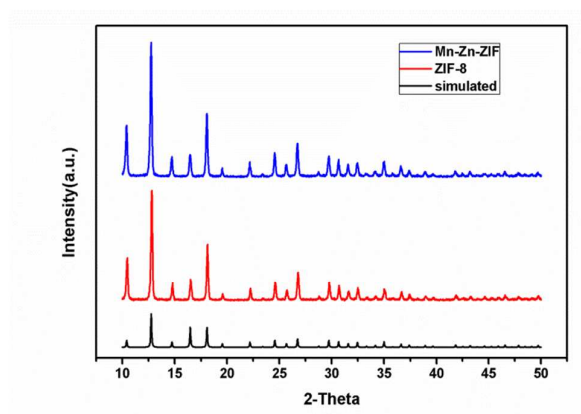

Figure S4. X-ray diffraction (XRD) patterns of simulated ZIF-8, synthesized ZIF-8 and Mn-Zn-ZIF nanoparticles.

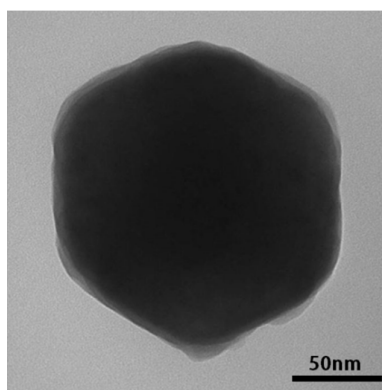

Figure S5. Enlarged TEM image of Mn-Zn-ZIF-PEG with a thin coated layer.

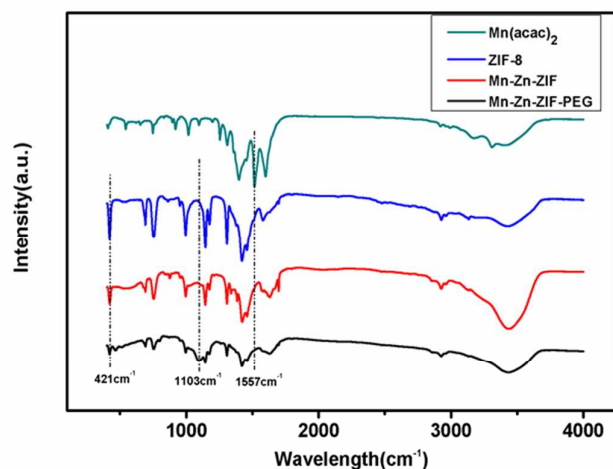

Figure S6. Fourier transform infrared spectroscopy (FTIR) patterns of  $\text{Mn}(\text{acac})_2$ , the precursor ZIF-8, Mn-Zn-ZIF and Mn-Zn-ZIF-PEG nanoparticles (full spectra).

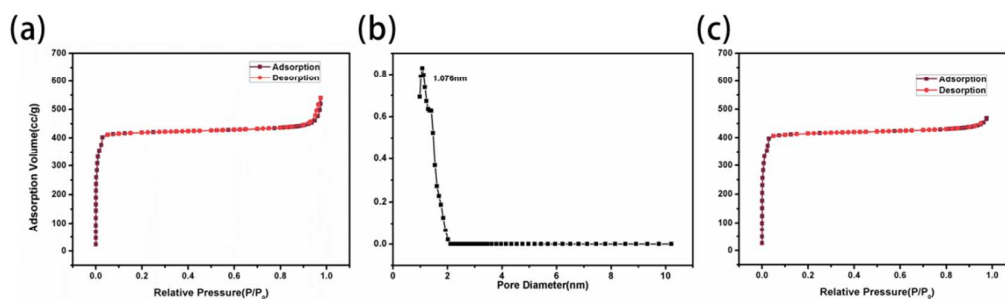

Figure S7. Nitrogen adsorption-desorption isotherms curves of (a) ZIF-8 and (c) Mn-Zn-ZIF; (b) the corresponding pore size distribution of ZIF-8 nanoparticles.

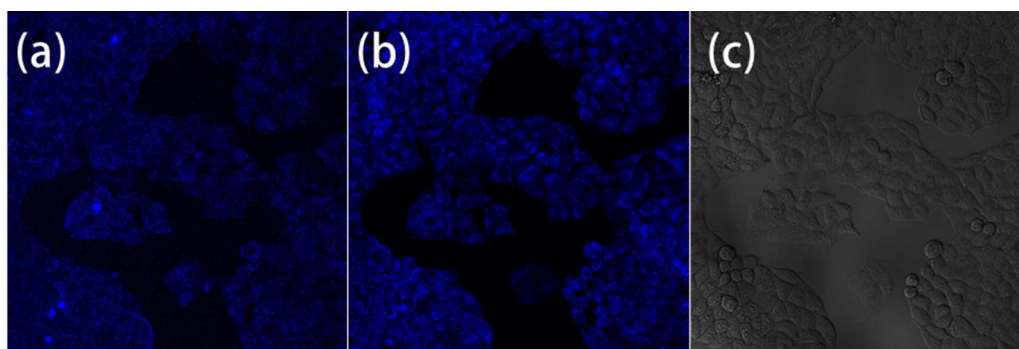

Figure S8. CLSM images of ZIF-8 excited by (a) 360 nm single-photon excitation and (b) 720 nm two-photon excitation and (c) bright field images.
